# Supplementary material for: Magnetic deep eutectic solvents: formation and properties
Source: Royal Society of Chemistry journal article supplement (doi:10.1039/d2cp01592g), 2022-01-01
Supplement: d2cp01592g1.pdf [file d2cp01592g1.pdf]

## Supplementary Information

### **Magnetic deep eutectic solvents: formation and properties**

Ruifen Shi<sup>a</sup>, Fengyi Zhou<sup>a</sup>, Yu Chen<sup>\*b</sup>, Zhenghui Liu<sup>\*c</sup>, Shuzi Liu<sup>a</sup>, Tiancheng Mu<sup>\*a</sup>

*a. Department of Chemistry, Renmin University of China, Beijing 100872, China. E-mail: tcmu@ruc.edu.cn; Tel: +86-10-62514925*

*b. Department of Chemistry and Material Science, Langfang Normal University, Langfang 065000, Hebei, P.R. China.*

*c. School of Pharmaceutical and Materials Engineering, Taizhou University, Taizhou 318000, Zhejiang, China.*

### Table of Contents

|                              | Section |
|------------------------------|---------|
| 1. Experiment                |         |
| .....                        | 2       |
| 2. Supplementary Figure..... |         |
| 3                            |         |
| 3. Table.....                | 4       |

## 1. Experiment Section

### Density model expression

For all prepared MDESs, the density values decrease linearly with temperature in the whole measured temperature range and thus could be expressed by the following equation (1):

$$\rho = a + bT \quad (1)$$

where  $\rho$  ( $\text{g cm}^{-3}$ ) corresponds to density,  $T$  is the temperature in  $^{\circ}\text{C}$ ,  $a$  and  $b$  are the fitting parameters.

### Viscosity model expression

The experimental viscosity values of MDESs were fitted as a function of temperature by using the Vogel-Fulcher-Tammann (VFT) model:

$$\ln \eta = A + \frac{B}{T - T_0} \quad (2)$$

where  $\eta$  ( $\text{mPa s}$ ) is the viscosity,  $T$  ( $^{\circ}\text{C}$ ) is the temperature,  $A$ ,  $B$  and  $T_0$  are adjustable parameters.

## 2. Supplementary Figures and Discussion

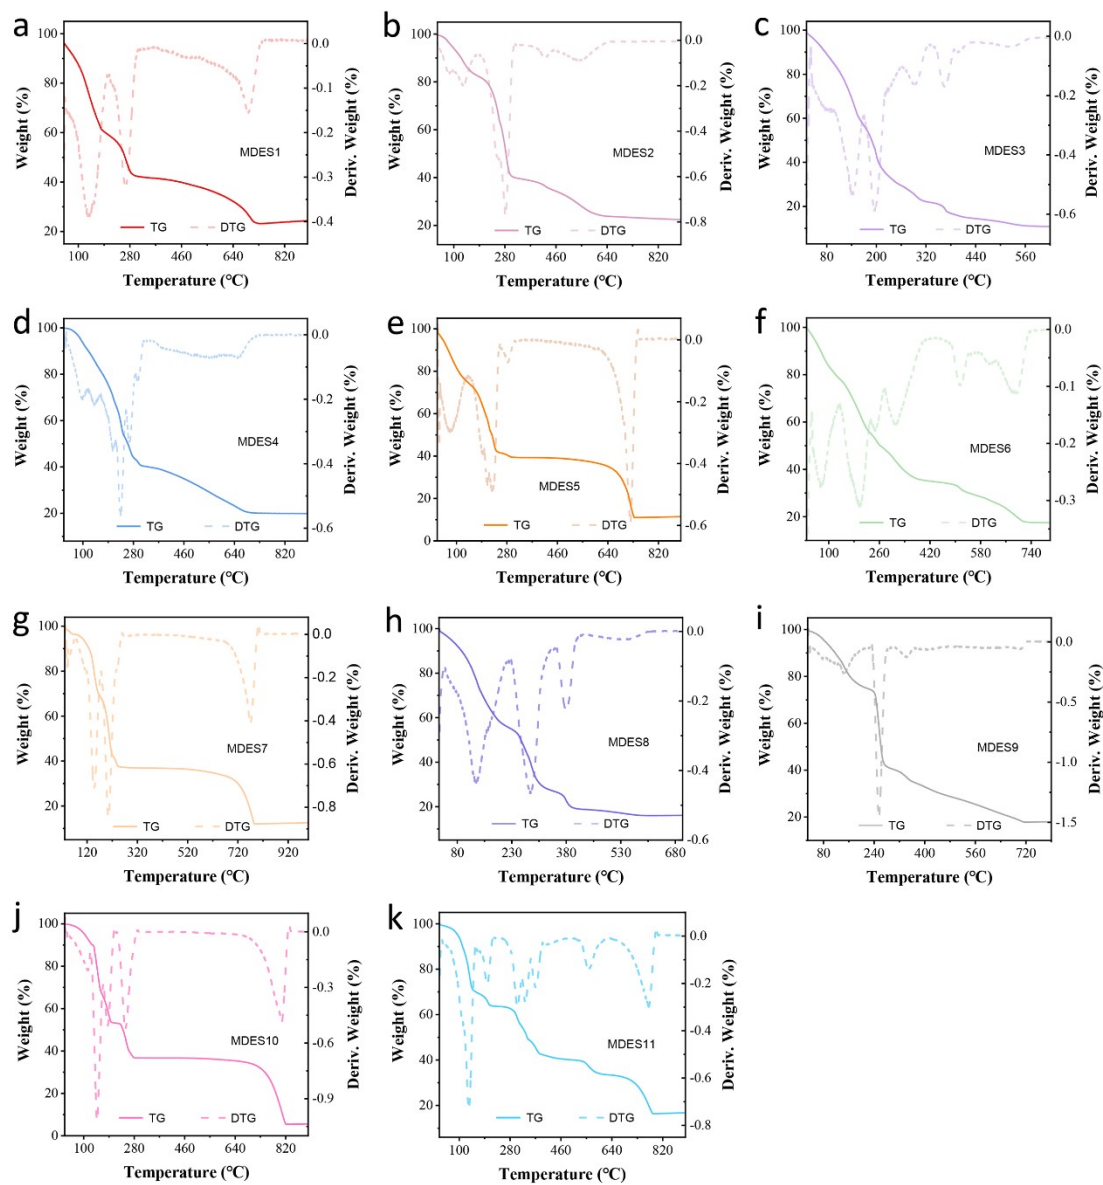

Figure S1. TG and DTG curves of MDESs.



### 3. Table

Table S1. The onset temperatures ( $T_{\text{onset}}$ ) and maximum decomposition temperatures of MDESs.

|        | $T_{\text{onset}}/^{\circ}\text{C}$ | $T_{\text{max}}/^{\circ}\text{C}$ |
|--------|-------------------------------------|-----------------------------------|
| MDES1  | 71.6                                | 136.7                             |
| MDES2  | 66.2                                | 281.6                             |
| MDES3  | 72.8                                | 141.4                             |
| MDES4  | 79.2                                | 234.6                             |
| MDES5  | 73.1                                | 227.6                             |
| MDES6  | 71.8                                | 199.2                             |
| MDES7  | 89.7                                | 205.3                             |
| MDES8  | 66.3                                | 133.4                             |
| MDES9  | 71.8                                | 255.8                             |
| MDES10 | 75.3                                | 148.2                             |
| MDES11 | 74.6                                | 134.7                             |

Table S2. Physicochemical properties (conductivity, Kamlet–Taft Parameters and pH) of MDES9 with different molar ratio at 25 °C.

| Components (molar ratio)                                   | $\sigma$ ( $\mu\text{S cm}^{-1}$ ) | $\alpha$ | $\beta$ | $\pi^*$ | pH  |
|------------------------------------------------------------|------------------------------------|----------|---------|---------|-----|
| $\text{NiCl}_2 \cdot 6\text{H}_2\text{O}$ : Glycerol (1:1) | 2800                               | 1.20     | 1.01    | 0.94    | 2.4 |
| $\text{NiCl}_2 \cdot 6\text{H}_2\text{O}$ : Glycerol (1:3) | 1370                               | 1.17     | 0.98    | 0.92    | 2.9 |

Table S3. Parameters a and b of Equation (1) and respective correlation coefficient ( $R^2$ ), depicting temperature dependence of density of the studied MDESs.

|        | a (g cm <sup>-3</sup> ) | b (g cm <sup>-3</sup> K <sup>-1</sup> ) | R <sup>2</sup> |
|--------|-------------------------|-----------------------------------------|----------------|
| MDES1  | 1.481                   | -9.037×10 <sup>-4</sup>                 | 0.999          |
| MDES2  | 1.546                   | -7.003×10 <sup>-4</sup>                 | 0.999          |
| MDES3  | 1.358                   | -9.163×10 <sup>-4</sup>                 | 0.999          |
| MDES4  | 1.510                   | -8.128×10 <sup>-4</sup>                 | 0.999          |
| MDES5  | 1.449                   | -1.080×10 <sup>-3</sup>                 | 0.999          |
| MDES6  | 1.559                   | -1.770×10 <sup>-3</sup>                 | 0.990          |
| MDES7  | 1.480                   | -5.688×10 <sup>-4</sup>                 | 0.999          |
| MDES8  | 1.367                   | -7.783×10 <sup>-4</sup>                 | 0.999          |
| MDES9  | 1.527                   | -5.666×10 <sup>-4</sup>                 | 0.999          |
| MDES10 | 1.494                   | -7.090×10 <sup>-4</sup>                 | 0.999          |
| MDES11 | 1.666                   | -2.901×10 <sup>-3</sup>                 | 0.955          |

Table S4. Fitted parameters of VFT model given by Equation (2) and respective correlation coefficient ( $R^2$ ) for prepared MDESs.

|        | A (mPa s) | B (K)  | $T_0$ (K) | $R^2$ |
|--------|-----------|--------|-----------|-------|
| MDES1  | -2.371    | 700.7  | 195.2     | 0.999 |
| MDES2  | -6.699    | 2306.3 | 154.0     | 0.999 |
| MDES3  | -2.341    | 695.7  | 205.2     | 0.999 |
| MDES4  | -2.455    | 866.5  | 201.4     | 0.999 |
| MDES5  | -1.988    | 583.1  | 209.9     | 0.999 |
| MDES6  | -2.921    | 755.4  | 200.9     | 0.999 |
| MDES7  | -2.384    | 920.0  | 169.3     | 0.999 |
| MDES8  | -3.199    | 1026.8 | 183.2     | 0.998 |
| MDES9  | -3.811    | 1425.5 | 171.3     | 1     |
| MDES10 | -3.179    | 1026.8 | 199.3     | 0.999 |
| MDES11 | -2.370    | 852.5  | 198.9     | 0.999 |
